# Supplementary material for: Centimeter-sized single crystals of 3D perovskitoid (4-AP)Pb2X6 (X = Br, I) for efficient and stable X-ray detection
Source: Royal Society of Chemistry journal article supplement (doi:10.1039/d6sc00616g), 2026-04-16
Supplement: d6sc00616g1.pdf [file d6sc00616g1.pdf]

## Supporting Information

### Centimeter-Sized Single Crystals of 3D perovskitoid (4-AP)Pb<sub>2</sub>X<sub>6</sub> (X = Br, I) for Efficient and Stable X-ray Detection

Hongliang Dai,<sup>a</sup> Zeng-Kui Zhu,<sup>\*b</sup> Shihai You,<sup>c</sup> Junhua Luo<sup>\*c</sup>

<sup>a</sup>School of Chemistry and Chemical Engineering, Key Laboratory of Jiangxi Province for Special Optoelectronic Artificial Crystal Materials, Jingtangshan University, Ji'an, Jiangxi, 343009, China

<sup>b</sup>College of Chemistry and Materials

Jiangxi Province Key Laboratory of Porous Functional Materials; Jiangxi Normal University, Nanchang, Jiangxi, 330022, China. E-mail: zkzhu@jxnu.edu.cn

<sup>c</sup>State Key Laboratory of Functional Crystals and Devices

Fujian Institute of Research on the Structure of Matter, Chinese Academy of Sciences, Fuzhou, Fujian, 350002, China. E-mail: jhluo@fjirsm.ac.cn

**Materials** 4-Amidinopyridinium (4-AP) chloride (98%, Aladdin); lead acetate trihydrate (Pb(Ac)<sub>2</sub>•3H<sub>2</sub>O, 99.5%, Aladdin), hydrobromic acid (HBr, 48%, Aladdin), hydroiodic acid (HI, 55-57%, Aladdin). All the chemicals were bought and used without further purification.

**Synthesis** Crystalline materials of (4-AP)Pb<sub>2</sub>Br/I<sub>6</sub> were obtained from saturated HBr/I solution (45 mL) containing stoichiometric amounts of Pb(Ac)<sub>2</sub>•3H<sub>2</sub>O (4 mmol, 1.516 g) and corresponding 4-Amidinopyridinium (4-AP) chloride (1 mmol, 0.157 g). The saturated solution was then heated and stirred for 30 min at 100°C to get the clear solution. With the solution temperature decreasing to saturated status, microcrystals were obtained by spontaneous nucleation. Bulk crystals were grown by slowly cooling (1°C/day) the above solution from 80°C to 30°C.

**Powder X-ray diffraction** Powder X-ray diffraction (PXRD) was recorded on a Rigaku MiniFlex diffractometer at room temperature. The diffraction patterns were collected in the 2θ range of 5°-50° with a step size of 0.02°. The experimental PXRD patterns match fairly well with the simulated data based on the single-crystal structure, which confirm the pure phase of (4-AP)Pb<sub>2</sub>Br/I<sub>6</sub> (Fig. S1-2). For the sample after exposed to ambient air for 90 days, it shows environmental stability with negligible phase change. (Fig. 2d-e)

**Thermogravimetric analysis (TGA) measurement** TGA was performed on STA449C Thermal Analyser ranging from the room temperature to 1000°C (Fig. 1c).

**Single-crystal structure determination:** Single-crystal X-ray diffraction was performed on a Bruker 8 diffractometer with the Mo Kα radiation. The data were processed by the Crystalclear software package. The structures were solved by direct methods and then refined by the full-matrix least-squares refinements on F2 using SHELXLTL software package. Crystallographic data and structure refinements for (4-AP)Pb<sub>2</sub>Br/I<sub>6</sub> are given in Table S1.

**X-ray detection** The I-V traces and I-t curves under X-ray irradiation were recorded using the 6517B high precision electrometer (Keithley, USA). A commercially available Ag target X-ray tube with X-ray photons energy up to 50 keV and peak intensity at 22 keV was used as the X-ray source (4 W, Mini-X2, Amptek, USA). The dose rate of X-ray tube was modulated by changing its tube current and measured by a commercial X-ray dosimeter (Accu-Gold, Radcal, USA) attached with the ion chamber (10X6-180 model) in an integrating mode.

**Calculations of mobility lifetime product ( $\mu\tau$ )** the  $\mu\tau$  product has been extracted by fitting the voltage-dependent photoconductivity under X-ray irradiation with the standard Hecht equation,

$$I = \frac{I_0 \mu \tau V}{L^2} \left[ 1 - \exp\left(-\frac{L^2}{\mu \tau V}\right) \right]$$

where  $I$  is the photocurrent,  $I_0$  is the saturated photocurrent,  $L$  is the electrode spacing (1 mm for both A and B detectors),  $V$  is the bias voltage,  $\mu$  is carrier mobility, and  $\tau$  is carrier lifetime.

**Calculations of sensitivity (S) and signal-to-noise ratio (SNR)**  $S$  is defined as the collected charge per unit area under X-ray irradiation and can be determined by

$$S = (I_{x\text{-ray}} - I_d) / (D \times A)$$

where  $I_{x\text{-ray}}$  and  $I_d$  are the currents recorded under X-ray irradiation and in the dark, respectively,  $D$  is the irradiation dose rate, and  $A$  is the effective area of detector.

SNR is calculated by

$$SNR = (I_{x\text{-ray}} - I_d) / I_{\text{noise}}$$

where  $I_{\text{noise}}$  is the noise current and is obtained by calculating the standard deviation of the  $I_{x\text{-ray}}$ .

**Calculation of Dark Current Drift ( $I_{\text{drift}}$ )** The dark current drift is determined by the following equation

$$I_{\text{drift}} = (I_t - I_0) / (E \times S \times t)$$

where  $I_0$  is the current immediately after stabilization,  $I_t$  is the current at time  $t$ ,  $E$  is the electric field,  $S$  is the device area.

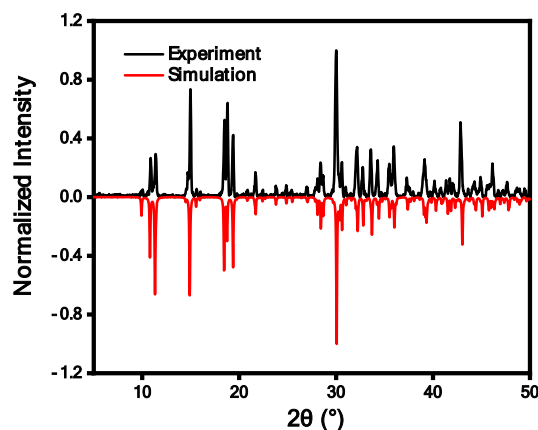

**Fig. S1** Experimental and simulated powder X-ray diffraction patterns of (4-AP)Pb<sub>2</sub>Br<sub>6</sub>.

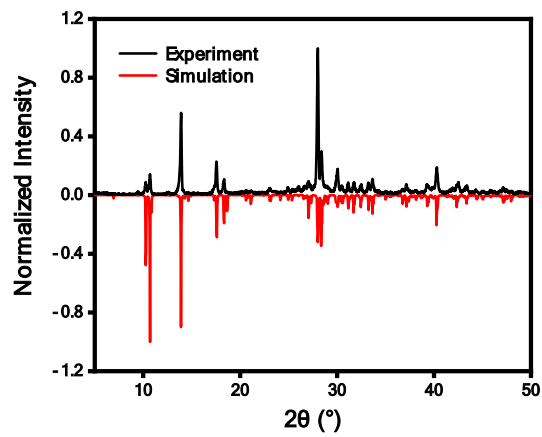

Fig. S2 Experimental and simulated powder X-ray diffraction patterns of (4-AP)Pb<sub>2</sub>I<sub>6</sub>.

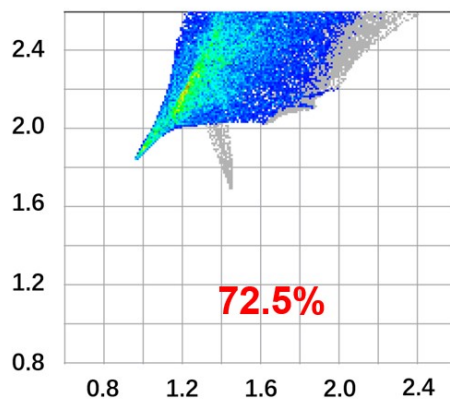

Fig. S3 2D fingerprint plots for 4-AP<sup>2+</sup> cations in (4-AP)Pb<sub>2</sub>I<sub>6</sub>.

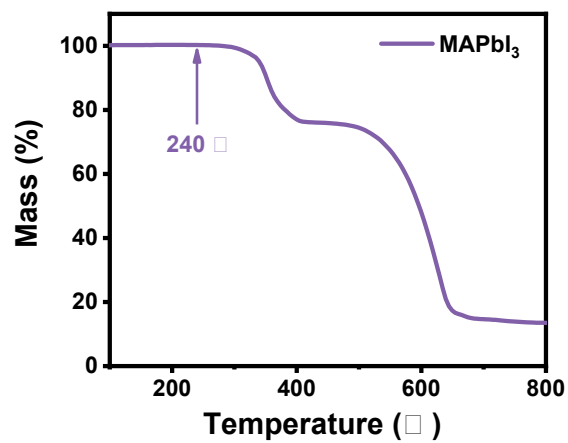

Fig. S4 The thermogravimetric cure of MAPbI<sub>3</sub>.

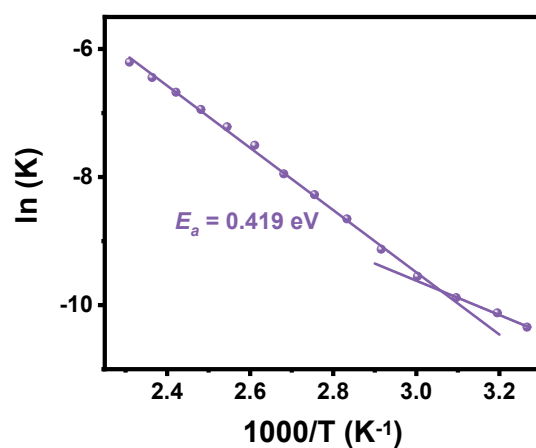

Fig. S5 Temperature-dependent conductivity of MAPbI<sub>3</sub> SC.

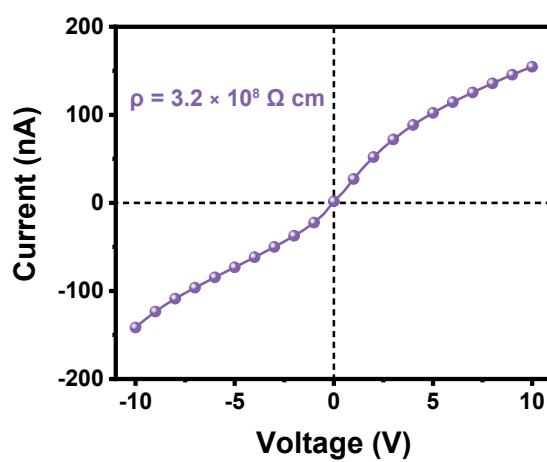

Fig. S6 Resistivity of MAPbI<sub>3</sub> SC.

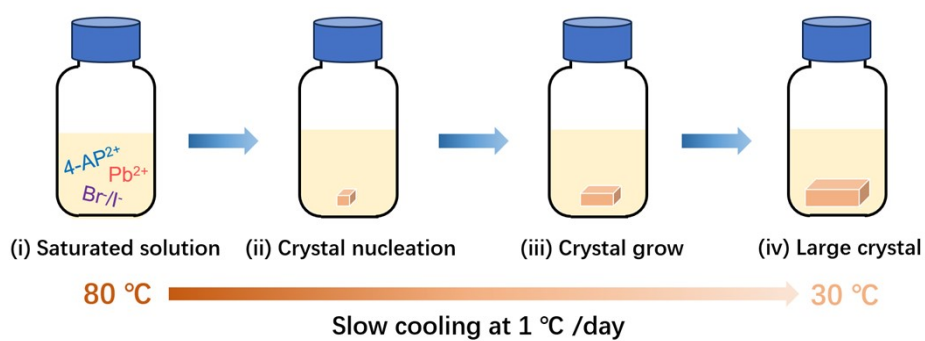

Fig. S7 Schematic diagram of the crystal growth process.

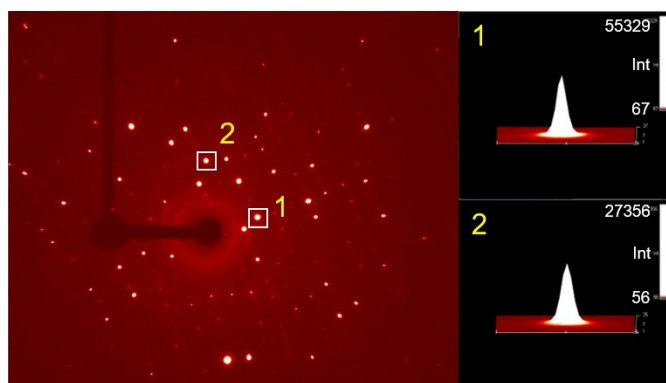

Fig. S8 SCXRD diffraction spots of (4-AP)Pb<sub>2</sub>I<sub>6</sub>.

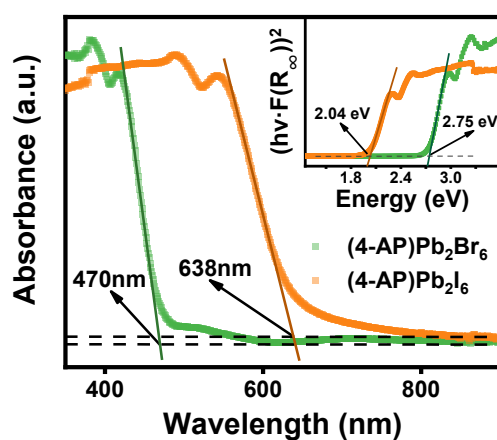

Fig. S9 UV-vis absorption spectra of (4-AP)Pb<sub>2</sub>Br<sub>6</sub> and (4-AP)Pb<sub>2</sub>I<sub>6</sub>. Insert: the energy band estimated by a Tauc's plot.

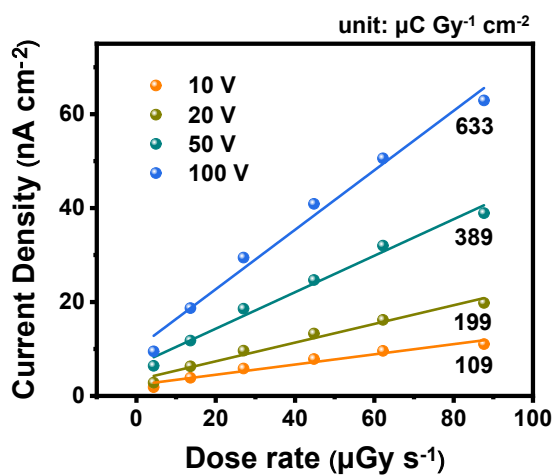

Fig. S10 Photocurrent density of (4-AP)Pb<sub>2</sub>Br<sub>6</sub> detectors under various dose rates at different bias voltage.

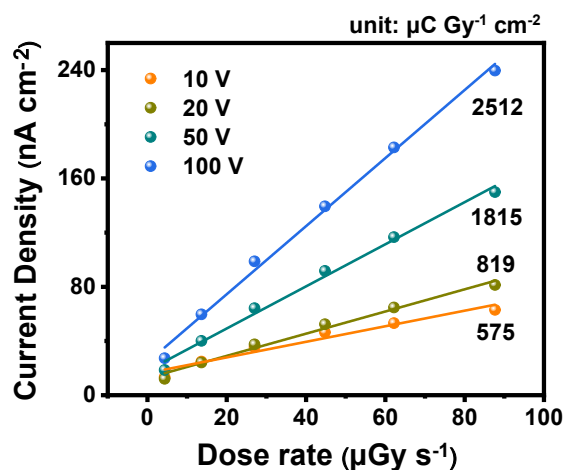

Fig. S11 Photocurrent density of (4-AP)Pb<sub>2</sub>I<sub>6</sub> detectors under various dose rates at different bias voltage.

Table S1. Crystallographic Data and Structure Refinements of (4-AP)Pb<sub>2</sub>Br/I<sub>6</sub>.

|                                          | (4-AP)Pb <sub>2</sub> Br <sub>6</sub>                                        | (4-AP)Pb <sub>2</sub> I <sub>6</sub>                                        |
|------------------------------------------|------------------------------------------------------------------------------|-----------------------------------------------------------------------------|
| CCDC Identification code                 | 2312099                                                                      | 2312100                                                                     |
| Empirical formula                        | C <sub>6</sub> H <sub>9</sub> Br <sub>6</sub> N <sub>3</sub> Pb <sub>2</sub> | C <sub>6</sub> H <sub>8</sub> I <sub>6</sub> N <sub>3</sub> Pb <sub>2</sub> |
| Formula weight                           | 1008.068                                                                     | 1297.93                                                                     |
| Temperature/K                            | 295.00(10)                                                                   | 295.00(10)                                                                  |
| Crystal system                           | orthorhombic                                                                 | orthorhombic                                                                |
| Space group                              | <i>Pnna</i>                                                                  | <i>Pnna</i>                                                                 |
| <i>a</i> /Å                              | 23.9011(15)                                                                  | 25.5050(12)                                                                 |
| <i>b</i> /Å                              | 15.7772(10)                                                                  | 16.5271(9)                                                                  |
| <i>c</i> /Å                              | 9.6867(5)                                                                    | 10.0933(6)                                                                  |
| $\alpha$ /°                              | 90                                                                           | 90                                                                          |
| $\beta$ /°                               | 90                                                                           | 90                                                                          |
| $\gamma$ /°                              | 90                                                                           | 90                                                                          |
| Volume/Å <sup>3</sup>                    | 3652.8(4)                                                                    | 4254.6(4)                                                                   |
| Z                                        | 8                                                                            | 8                                                                           |
| $\rho_{\text{calc}}$ /cm <sup>3</sup>    | 3.666                                                                        | 4.053                                                                       |
| $\mu$ /mm <sup>-1</sup>                  | 31.525                                                                       | 24.503                                                                      |
| <i>F</i> (000)                           | 3399.3                                                                       | 4376.0                                                                      |
| Radiation                                | Mo K $\alpha$ ( $\lambda$ = 0.71073)                                         | Mo K $\alpha$ ( $\lambda$ = 0.71073)                                        |
| 2 $\theta$ range for data collection/°   | 6.82 to 57.68                                                                | 6.57 to 57.634                                                              |
| Index ranges                             | -31 $\leq h \leq$ 26,<br>-19 $\leq k \leq$ 18,<br>-10 $\leq l \leq$ 12       | -29 $\leq h \leq$ 33,<br>-18 $\leq k \leq$ 22,<br>-13 $\leq l \leq$ 10      |
| Reflections collected                    | 17692                                                                        | 17964                                                                       |
| Independent reflections                  | 4042 [ $R_{\text{int}}$ = 0.0459, $R_{\text{sigma}}$ = 0.0391]               | 4758 [ $R_{\text{int}}$ = 0.0408,<br>$R_{\text{sigma}}$ = 0.0366]           |
| Data/restraints/parameters               | 4042/0/157                                                                   | 4758/0/157                                                                  |
| Goodness-of-fit on <i>F</i> <sup>2</sup> | 1.061                                                                        | 1.054                                                                       |
| Final R indexes [ $I > 2\sigma(I)$ ]     | $R_1$ = 0.0352, $wR_2$ = 0.0731                                              | $R_1$ = 0.0419, $wR_2$ =<br>0.0917                                          |
| Final R indexes [all data]               | $R_1$ = 0.0615, $wR_2$ = 0.0867                                              | $R_1$ = 0.0640, $wR_2$ =<br>0.1038                                          |

**Table S2.** Performances of some reported MHP and perovskitoid X-ray single-crystal detectors.

| Materials                                                                                                               | Dimensionality | Sensitivity ( $\mu\text{C Gy}^{-1} \text{cm}^{-2}$ ) | Detection limit ( $\text{nGy s}^{-1}$ ) | Current drift ( $\text{nA cm}^{-1} \text{s}^{-1} \text{V}^{-1}$ ) | Ref.             |
|-------------------------------------------------------------------------------------------------------------------------|----------------|------------------------------------------------------|-----------------------------------------|-------------------------------------------------------------------|------------------|
| (4-AP)Pb <sub>2</sub> Br <sub>6</sub>                                                                                   | 3D             | 633                                                  | 14900                                   | $3.1 \times 10^{-6}$                                              | <b>This work</b> |
| (4-AP)Pb <sub>2</sub> I <sub>6</sub>                                                                                    |                | 2512                                                 | 720                                     | $1.48 \times 10^{-5}$                                             |                  |
| Cs <sub>2</sub> AgBiBr <sub>6</sub>                                                                                     | 3D             | 1974                                                 | 45.7                                    | -                                                                 | [1]              |
| CsPbBr <sub>3</sub>                                                                                                     | 3D             | 46180                                                | 10.81                                   | $1.68 \times 10^{-6}$                                             | [2]              |
| MAPbI <sub>3</sub>                                                                                                      | 3D             | $5.2 \times 10^6$                                    | 0.1                                     | -                                                                 | [3]              |
| MAPbBr <sub>3</sub>                                                                                                     | 3D             | 96000                                                | 2.8                                     | -                                                                 | [4]              |
| FAPbBr <sub>3</sub>                                                                                                     | 3D             | 185.64                                               | 133                                     | -                                                                 | [5]              |
| CsFAGAPb(I <sub>0.9</sub> Br <sub>0.1</sub> ) <sub>3</sub> : Sr                                                         | 3D             | 26000                                                | 7.09                                    | $8.77 \times 10^{-5}$                                             | [6]              |
| FAPbBr <sub>3</sub>                                                                                                     | 3D             | 130                                                  | 300                                     | -                                                                 | [7]              |
| (3AMPY)Pb <sub>2</sub> I <sub>6</sub>                                                                                   | 3D             | 207                                                  | -                                       | -                                                                 | [8]              |
| MhyPbBr <sub>3</sub>                                                                                                    | 3D             | 220 (0 V)                                            | 203                                     | 0                                                                 | [9]              |
|                                                                                                                         |                | 514 (100 V)                                          | 5428                                    | $5.77 \times 10^{-5}$                                             |                  |
| (R/S-BPEA)EA <sub>6</sub> Pb <sub>4</sub> Cl <sub>15</sub>                                                              | 3D             | 1709.09                                              | 3500                                    | -                                                                 | [10]             |
| [(Cu(O <sub>2</sub> C-(CH <sub>2</sub> ) <sub>3</sub> -NH <sub>3</sub> ) <sub>2</sub> ) <sub>2</sub> ]PbBr <sub>4</sub> | 2D             | $1.14 \times 10^5$                                   | 56                                      | -                                                                 | [11]             |
| (BZA) <sub>2</sub> (MA)Pb <sub>2</sub> Br <sub>7</sub>                                                                  | 2D             | 97.9                                                 | 266                                     | $3.9 \times 10^{-6}$                                              | [12]             |
| (CH <sub>3</sub> OC <sub>3</sub> H <sub>9</sub> N) <sub>2</sub> CsPb <sub>2</sub> Br <sub>7</sub>                       | 2D             | 410                                                  | -                                       | -                                                                 | [13]             |
| BA <sub>2</sub> EA <sub>2</sub> Pb <sub>3</sub> I <sub>10</sub>                                                         | 2D             | 5555.7                                               | 17.2                                    | $9.25 \times 10^{-6}$                                             | [14]             |
| (4ABA)PbI <sub>4</sub>                                                                                                  | 2D             | 150                                                  | 7.5                                     | $5.18 \times 10^{-8}$                                             | [15]             |
| (BA) <sub>2</sub> PbI <sub>4</sub>                                                                                      | 2D             | 204                                                  | 241                                     | -                                                                 | [16]             |
| (PMA) <sub>2</sub> PbI <sub>4</sub>                                                                                     | 2D             | 283                                                  | 2130                                    | -                                                                 | [17]             |
| (F-PEA) <sub>2</sub> PbI <sub>4</sub>                                                                                   | 2D             | 3402                                                 | 23                                      | $4.9 \times 10^{-8}$                                              | [18]             |
| (o-F-PEA) <sub>2</sub> PbI <sub>4</sub>                                                                                 | 2D             | 1724.5                                               | 460                                     | $8.48 \times 10^{-8}$                                             | [19]             |
| (S-BPEA) <sub>2</sub> FAPb <sub>2</sub> I <sub>7</sub>                                                                  | 2D             | 87.8                                                 | 161                                     | -                                                                 | [20]             |
|                                                                                                                         |                | 1985.9                                               | 1100                                    | $4.4 \times 10^{-7}$                                              |                  |
| (2IPA) <sub>2</sub> FAPb <sub>2</sub> I <sub>7</sub>                                                                    | 2D             | 438                                                  | 20                                      | $7.76 \times 10^{-6}$                                             | [21]             |
| (1,3-BMACH)(MA)Pb <sub>2</sub> I <sub>7</sub>                                                                           | 2D             | 199                                                  | 106                                     | -                                                                 | [22]             |
| BDAPbI <sub>4</sub>                                                                                                     | 2D             | 242                                                  | 430                                     | $6.06 \times 10^{-9}$                                             | [23]             |
| (1,3-BMACH)BiI <sub>5</sub>                                                                                             | 1D             | 170                                                  | 49                                      | -                                                                 | [22]             |
| (BZA) <sub>2</sub> (R/S-PPA)BiI <sub>6</sub>                                                                            | 1D             | 53.2                                                 | 18.5                                    | -                                                                 | [24]             |
|                                                                                                                         |                | 2170                                                 | -                                       | -                                                                 |                  |
| (BAH)BiI <sub>4</sub>                                                                                                   | 1D             | 1181.8                                               | 77                                      | -                                                                 | [25]             |
| MA <sub>3</sub> Bi <sub>2</sub> I <sub>9</sub>                                                                          | 0D             | 1947                                                 | 83                                      | $5.0 \times 10^{-10}$                                             | [26]             |
| (R/S-PPA) <sub>2</sub> BiI <sub>5</sub>                                                                                 | 0D             | 31                                                   | 270                                     | 0                                                                 | [27]             |
|                                                                                                                         |                | 150 (10 V)                                           |                                         | $1.40 \times 10^{-4}$                                             |                  |
| (HIS)BiI <sub>5</sub>                                                                                                   | 0D             | 1230                                                 | 36.4                                    | $2.559 \times 10^{-7}$                                            | [28]             |

## Reference

- [1] L. Yin, H. Wu, W. Pan, B. Yang, P. Li, J. Luo, G. Niu, J. Tang, *Adv. Opt. Mater.* **2019**, *7*, 1900491.
- [2] Y. Hua, G. Zhang, X. Sun, X. Li, Z. Zhai, F. Cui, J. Liu, H. Liu, X. Tao, *Nat. Photonics* **2024**, *18*, 870-877.
- [3] Y. Song, L. Li, M. Hao, W. Bi, A. Wang, Y. Kang, H. Li, X. Li, Y. Fang, D. Yang, Q. Dong, *Adv. Mater.* **2021**, *33*, 2103078.
- [4] W. Zhang, H. Wang, Z. Chen, P. Wang, X. Liu, H. Dong, J. Zhao, Y. Cui and Y. Shao, *ACS Appl. Mater. Interfaces*, **2024**, *16*, 12844-12852.
- [5] M. Girolami, F. Matteocci, S. Pettinato, V. Serpente, E. Bolli, B. Paci, A. Generosi, S. Salvatori, A. Di Carlo and D. M. Trucchi, *Nano-Micro Letters*, 2024, *16*, 182.
- [6] J. Jiang, M. Xiong, K. Fan, C. Bao, D. Xin, Z. Pan, L. Fei, H. Huang, L. Zhou, K. Yao, X. Zheng, L. Shen, F. Gao, *Nat. Photonics* **2022**, *16*, 575-581.
- [7] M. Yao, J. Jiang, D. Xin, Y. Ma, W. Wei, X. Zheng, L. Shen, *Nano Lett.* **2021**, *21*, 3947-3955.
- [8] X. Li, Y. He, M. Kepenekian, P. Guo, W. Ke, J. Even, C. Katan, C. C. Stoumpos, R. D. Schaller, M. G. Kanatzidis, *J. Am. Chem. Soc.* **2020**, *142*, 6625-6637.
- [9] Q. Guan, S. You, Z.-K. Zhu, R. Li, H. Ye, C. Zhang, H. Li, C. Ji, X. Liu, J. Luo, *Angew. Chem. Int. Ed.* **2024**, *63*, e202320180.
- [10] Q. Guan, T. Zhu, Z. K. Zhu, H. Ye, S. You, P. Xu, J. Wu, X. Niu, C. Zhang, X. Liu, J. Luo, *Angew. Chem. Int. Ed.* **2023**, *62*, e202307034.
- [11] K. Guo, W. Li, Y. He, X. Feng, J. Song, W. Pan, W. Qu, B. Yang, H. Wei, *Angew. Chem. Int. Ed.* **2023**, *62*, e202303445.
- [12] J. Li, T. Zhu, H. Ye, Q. Guan, S. You, R. Li, Y. Geng, J. Luo, *Small* **2024**, DOI: 10.1002/smll.2024015452401545.
- [13] C. Ji, Y. Li, X. Liu, Y. Wang, T. Zhu, Q. Chen, L. Li, S. Wang, J. Luo, *Angew. Chem. Int. Ed.* **2021**, *60*, 20970-20976.
- [14] Y. Jiang, C. Zhang, Z. K. Zhu, J. Wu, P. Yu, Y. Zeng, H. Ye, H. Dai, R. Li, Q. Guan, G. Chen, H. Yang, J. Luo, *Angew. Chem. Int. Ed.* **2024**, *63*, e202407305.
- [15] Q. Fan, Y. Ma, S. You, H. Xu, W. Guo, Y. Liu, L. Tang, W. Li, J. Luo, Z. Sun, *Adv. Funct. Mater.* **2023**, *34*, 2312395.
- [16] Yukta, J. Ghosh, M. A. Afroz, S. Alghamdi, P. J. Sellin, S. Satapathi, *ACS Photonics* **2022**, *9*, 3529-3539.
- [17] C.-X. Qian, M.-Z. Wang, S.-S. Lu, H.-J. Feng, *Appl. Phys. Lett.* **2022**, *120*, 011901.
- [18] H. Li, J. Song, W. Pan, D. Xu, W. A. Zhu, H. Wei, B. Yang, *Adv. Mater.* **2020**, *32*, 2003790.
- [19] B. Zhang, Z. Xu, C. Ma, H. Li, Y. Liu, L. Gao, J. Zhang, J. You, S. Liu, *Adv. Funct. Mater.* **2022**, *32*, 2110392.
- [20] Q. Guan, H. Ye, S. You, Z. K. Zhu, H. Li, X. Liu, J. Luo, *Small* **2023**, *20*, e2307908.
- [21] S. You, P. Yu, J. Wu, Z. K. Zhu, Q. Guan, L. Li, C. Ji, X. Liu, J. Luo, *Adv. Sci.* **2023**, *10*, 2301149.
- [22] D. Fu, Z. Chen, Y. Chang, X.-M. Zhang, *Chem. Mater* **2023**, *35*, 9806-9816.
- [23] Y. Shen, Y. Liu, H. Ye, Y. Zheng, Q. Wei, Y. Xia, Y. Chen, K. Zhao, W. Huang, S. Liu, *Angew. Chem. Int. Ed.* **2020**, *59*, 14896-14902.
- [24] Z. K. Zhu, T. Zhu, S. You, P. Yu, J. Wu, Y. Zeng, Q. Guan, Z. Li, C. Qu, H. Zhong, L. Li, J. Luo, *Small* **2023**, *20*, e2307454.
- [25] C. Ma, H. Li, M. Chen, Y. Liu, K. Zhao, S. Liu, *Adv. Funct. Mater.* **2022**, *32*, 2202160.
- [26] Y. Liu, Z. Xu, Z. Yang, Y. Zhang, J. Cui, Y. He, H. Ye, K. Zhao, H. Sun, R. Lu, M. Liu, M. G. Kanatzidis, S. Liu, *Matter* **2020**, *3*, 180-196.
- [27] S. You, Z. K. Zhu, S. Dai, J. Wu, Q. Guan, T. Zhu, P. Yu, C. Chen, Q. Chen, J. Luo, *Adv. Funct. Mater.* **2023**, *33*, 2303523.
- [28] Z. Zhao, Q. Fan, Y. Liu, H. Rong, H. Ni, L. Wei, X. Zhao, J. Luo, Z. Sun, *ACS Appl. Mater. Interfaces* **2024**, *16*, 38283-38289.
